# Supplementary material for: The Fission Yeast RNA-Binding Protein Meu5 Is Involved in Outer Forespore Membrane Breakdown during Spore Formation
Source: MDPI journal article supplement (doi:10.3390/jof6040284), 2020-11-13
Supplement: s1 [file s1]

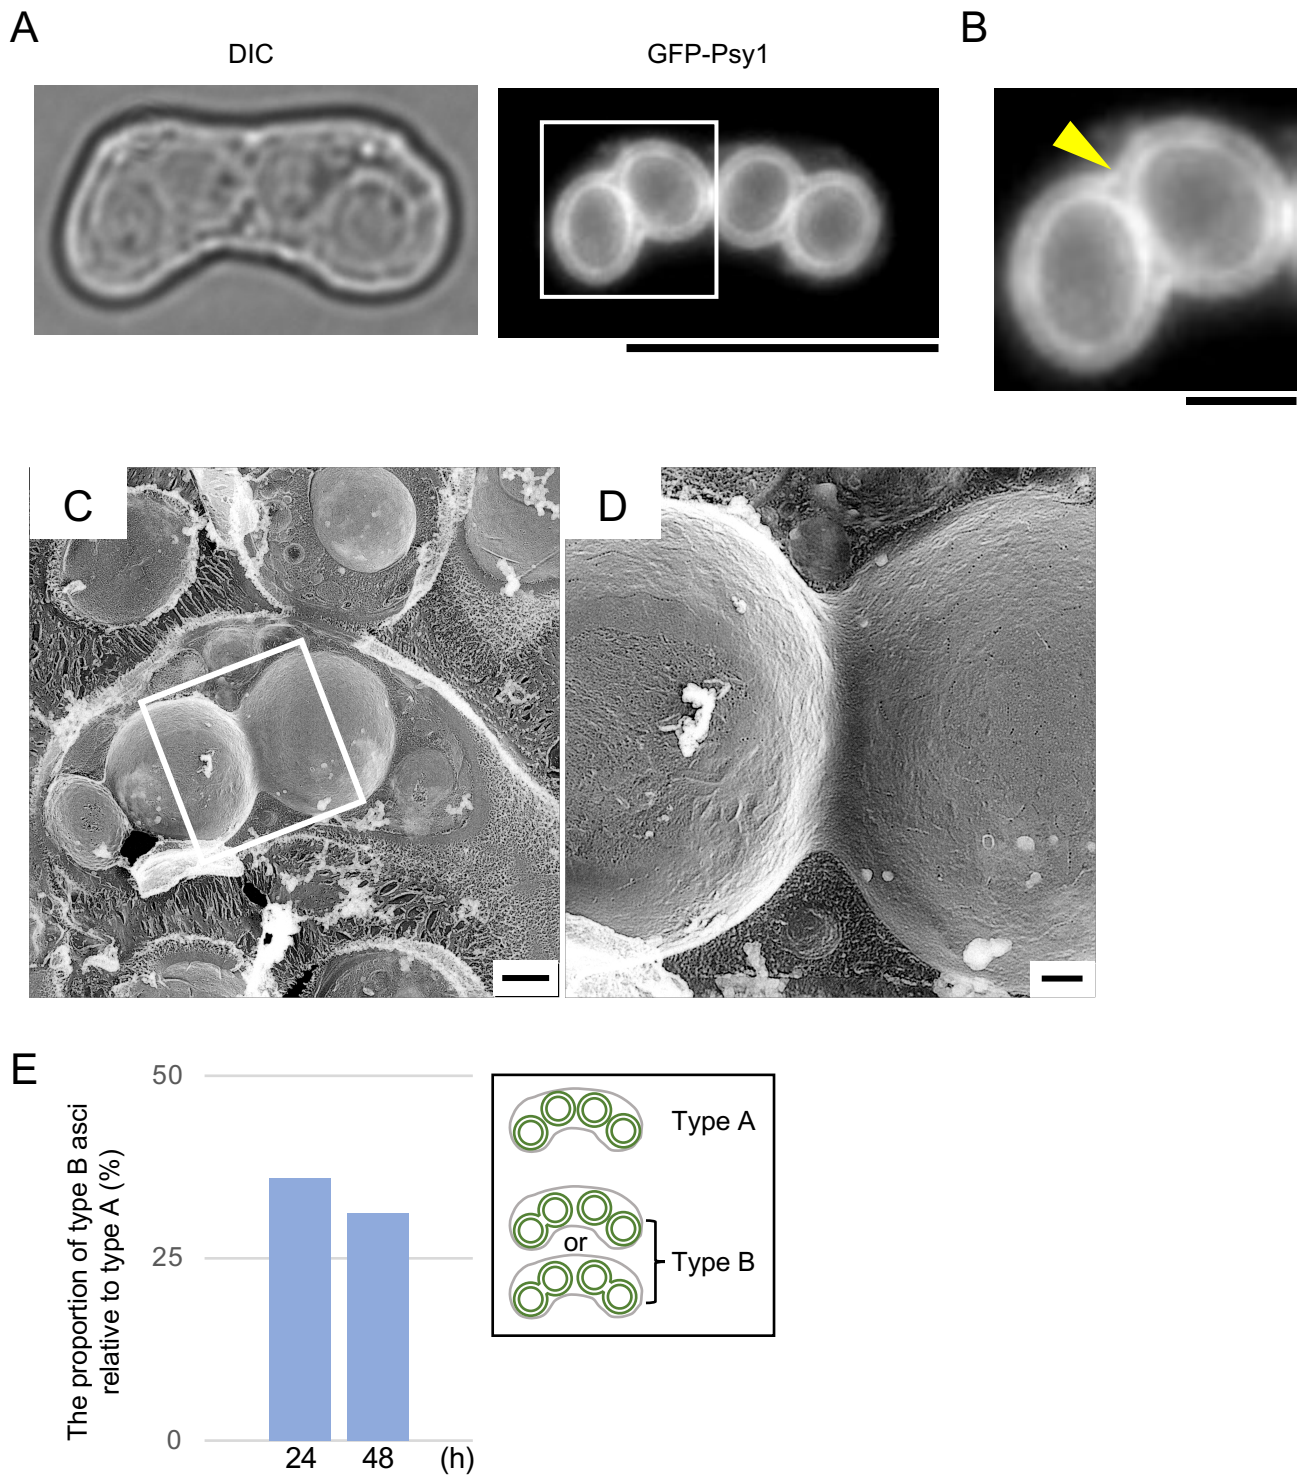

**Figure S1.** The outer FSM fuses with a neighboring spore in the *meu5-E22* mutant. *meu5-E22* (E22) cells were sporulated on ME medium for 2 days and analyzed by fluorescence microscopy (**A,B**) and quick-freeze deep-etch replica electron microscopy (**C,D**). High-magnification images of the region in the white square are shown on the right. Yellow arrowhead indicates the possible outer layer of the FSM. Bar, 10  $\mu\text{m}$  (**A**); 2  $\mu\text{m}$  (**B**); 1  $\mu\text{m}$  (**C**); 0.3  $\mu\text{m}$  (**D**). (**E**) Outer FSM fusion frequency in the *meu5-E22* mutant. Cells were cultured on SSA medium for 24 or 48 hours and analyzed by fluorescence microscopy ( $n > 200$ ). The proportion of type B asci relative to type A asci was quantified.

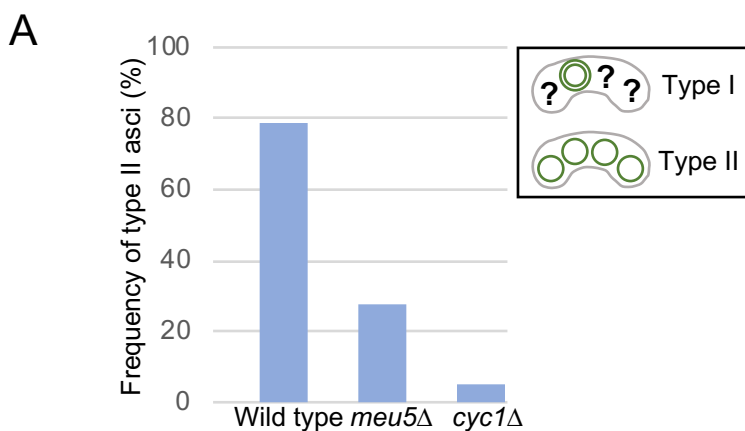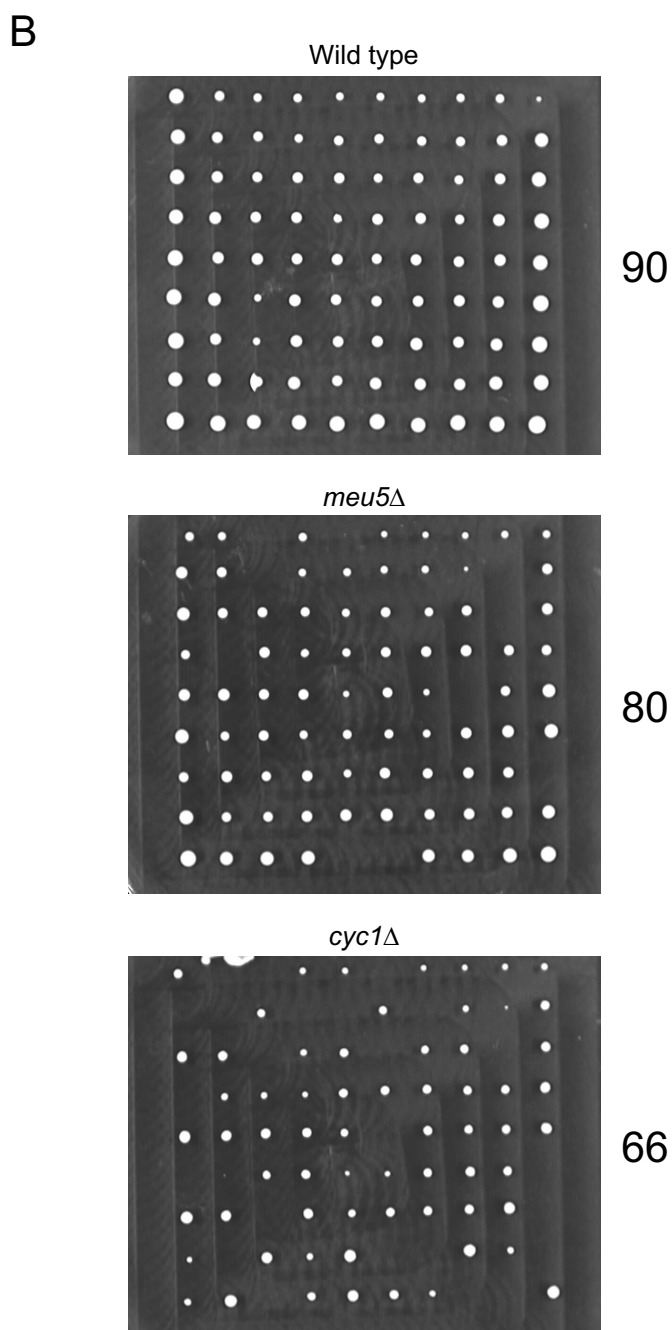

**Figure S2.** Ascus germination rates of *meu5Δ* and *cyc1Δ*. Wild-type (KI36), *meu5Δ* (BW85), and *cyc1Δ* (BW22) cells were sporulated on SSA medium for 2 days. **(A)** Frequency of outer FSM breakdown. **(B)** Germination of *meu5Δ* and *cyc1Δ* spores. For each strain, 90 asci were placed on YE medium and incubated at 30°C for 4 days. The number of colonies was counted.
