# Supplementary material for: The Fission Yeast RNA-Binding Protein Meu5 Is Involved in Outer Forespore Membrane Breakdown during Spore Formation
Source: MDPI journal article supplement (doi:10.3390/jof6040284), 2020-11-13
Supplement: s1 [file s1]

Table S1. Strain list

| Strain               | Genotype                                                                                                                                    | Source     |
|----------------------|---------------------------------------------------------------------------------------------------------------------------------------------|------------|
| ET1 (FY25629)        | <i>h<sup>90</sup> ade6&lt;&lt;GFP-psy1 ura4-D18</i>                                                                                         | This study |
| E22 (FY39280)        | <i>h<sup>90</sup> ade6&lt;&lt;GFP-psy1 meu5-E22 ura4-D18</i>                                                                                | This study |
| BW13 (FY39293)       | <i>h<sup>90</sup> ade6&lt;&lt;GFP-psy1 meu7::kanMX4 ura4-D18</i>                                                                            | This study |
| BW15 (FY39295)       | <i>h<sup>90</sup> ade6&lt;&lt;GFP-psy1 meu30::kanMX4 ura4-D18 leu1-32</i>                                                                   | This study |
| BW20 (FY39300)       | <i>h<sup>90</sup> leu1&lt;&lt;GFP-psy1 atg24::kanMX4 ade6-M216</i>                                                                          | This study |
| BW22 (FY39302)       | <i>h<sup>90</sup> leu1&lt;&lt;GFP-psy1 cyc1::kanMX4 ade6-M216</i>                                                                           | This study |
| BW23 (FY39303)       | <i>h<sup>90</sup> leu1&lt;&lt;GFP-psy1 mpf1::kanMX4 ade6-M216</i>                                                                           | This study |
| BW24 (FY39304)       | <i>h<sup>90</sup> leu1&lt;&lt;GFP-psy1 uvi15::kanMX4 ade6-M210</i>                                                                          | This study |
| BW26 (FY39306)       | <i>h<sup>90</sup> leu1&lt;&lt;GFP-psy1 hhp1::kanMX4 ade6-M210</i>                                                                           | This study |
| BW28 (FY39308)       | <i>h<sup>90</sup> leu1&lt;&lt;GFP-psy1 pso2::kanMX4 ade6-M210</i>                                                                           | This study |
| BW29 (FY39309)       | <i>h<sup>90</sup> leu1&lt;&lt;GFP-psy1 SPAC977.06::kanMX4 ade6-M216</i>                                                                     | This study |
| BW40 (FY39320)       | <i>h<sup>90</sup> leu1&lt;&lt;mCherry-psy1 isp3-GFP</i>                                                                                     | This study |
| BW41 (FY39321)       | <i>h<sup>90</sup> ade6&lt;&lt;GFP-psy1 meu5::kanMX4 ura4-D18</i>                                                                            | This study |
| BW46 (FY39326)       | <i>h<sup>90</sup> ade6&lt;&lt;GFP-psy1 meu5::meu5-3HA-kanMX6 ura4-D18</i>                                                                   | This study |
| BW47 (FY39327)       | <i>h<sup>90</sup> ade6&lt;&lt;GFP-psy1 meu5-E22::meu5-E22-3HA-kanMX6 ura4-D18</i>                                                           | This study |
| BW84 (FY39364)       | <i>h<sup>90</sup> leu1&lt;&lt;GFP-psy1 meu5::kanMX4</i>                                                                                     | This study |
| BW85 (FY39365)       | <i>h<sup>90</sup> leu1&lt;&lt;GFP-psy1 meu5::KanMX4 ade6-M210</i>                                                                           | This study |
| BW144 (FY39424)      | <i>h<sup>90</sup> ade6&lt;&lt;GFP-psy1 isp3::ura4 ura4-D18</i>                                                                              | This study |
| BW162 (FY39442)      | <i>h<sup>90</sup> ade6&lt;&lt;mCherry-atb2 leu1&lt;&lt;GFP-psy1 meu5::kanMX4</i>                                                            | This study |
| BW303 (FY39583)      | <i>h<sup>90</sup> leu1&lt;&lt;mCherry-psy1 isp3-GFP cyc1::kanMX4</i>                                                                        | This study |
| KI36 (FY25759)       | <i>h<sup>90</sup> leu1&lt;&lt;GFP-psy1 ade6-M210</i>                                                                                        | [30]       |
| KI173 (FY25662)      | <i>h<sup>90</sup> ade6&lt;&lt;mCherry-atb2 leu1&lt;&lt;GFP-psy1</i>                                                                         | [30]       |
| STA71                | <i>h<sup>90</sup> leu1&lt;&lt;mCherry-psy1 isp3-GFP meu5::kanMX4 ade6-M216 ura4-D18</i>                                                     | Lab stock  |
| YN68 (FY12296)       | <i>h<sup>90</sup> leu1&lt;&lt;GFP-psy1</i>                                                                                                  | [48]       |
| MU m58 (FY39640)     | <i>h<sup>90</sup> mug58::kanMX6 ade6&lt;&lt;GFP-psy1 his7::lacI-GFP lys1::lacO ura4-D18</i>                                                 | This study |
| MU m63 (FY39644)     | <i>h<sup>90</sup> mug63::kanMX6 ade6&lt;&lt;GFP-psy1 his7::lacI-GFP lys1::lacO ura4-D18</i>                                                 | This study |
| MU m67 (FY39648)     | <i>h<sup>90</sup> mug67::kanMX6 ade6&lt;&lt;GFP-psy1 his7::lacI-GFP lys1::lacO ura4-D18</i>                                                 | This study |
| MU m75 (FY39655)     | <i>h<sup>90</sup> mug75::kanMX6 ade6&lt;&lt;GFP-psy1 his7::lacI-GFP lys1::lacO ura4-D18</i>                                                 | This study |
| MU m86 (FY39665)     | <i>h<sup>90</sup> mug86::kanMX6 ade6&lt;&lt;GFP-psy1 his7::lacI-GFP lys1::lacO ura4-D18</i>                                                 | This study |
| MU m109 (FY39681)    | <i>h<sup>90</sup> mug109::kanMX6 ade6&lt;&lt;GFP-psy1 his7::lacI-GFP lys1::lacO ura4-D18</i>                                                | This study |
| MU m110 (FY39682)    | <i>h<sup>90</sup> mug110::kanMX6 ade6&lt;&lt;GFP-psy1 his7::lacI-GFP lys1::lacO ura4-D18</i>                                                | This study |
| MU m111 (FY39683)    | <i>h<sup>90</sup> mug111::kanMX6 ade6&lt;&lt;GFP-psy1 his7::lacI-GFP lys1::lacO ura4-D18</i>                                                | This study |
| MU m113 (FY39685)    | <i>h<sup>90</sup> mug113::kanMX6 ade6&lt;&lt;GFP-psy1 his7::lacI-GFP lys1::lacO ura4-D18</i>                                                | This study |
| MU m120 (FY39690)    | <i>h<sup>90</sup> mug120::kanMX6 ade6&lt;&lt;GFP-psy1 his7::lacI-GFP lys1::lacO ura4-D18</i>                                                | This study |
| MU m129 (FY39698)    | <i>h<sup>90</sup> mug129::kanMX6 ade6&lt;&lt;GFP-psy1 his7::lacI-GFP lys1::lacO ura4-D18</i>                                                | This study |
| MU m139 (FY39707)    | <i>h<sup>90</sup> mug139::kanMX6 ade6&lt;&lt;GFP-psy1 his7::lacI-GFP lys1::lacO ura4-D18</i>                                                | This study |
| MU m142 (FY39710)    | <i>h<sup>90</sup> mug142::kanMX6 ade6&lt;&lt;GFP-psy1 his7::lacI-GFP lys1::lacO ura4-D18</i>                                                | This study |
| MU m145 (FY39713)    | <i>h<sup>90</sup> mug145::kanMX6 ade6&lt;&lt;GFP-psy1 his7::lacI-GFP lys1::lacO ura4-D18</i>                                                | This study |
| <i>are2Δ</i>         | <i>h<sup>90</sup> his5::URA3::his5 leu1&lt;&lt;GFP-psy1 sid4-tdTomato::hphMX6 ura4-D18<br/>leu1-32 cyh<sup>R</sup> are2::kanMX4</i>         | [49]       |
| <i>pmp3Δ</i>         | <i>h<sup>90</sup> his5::URA3::his5 leu1&lt;&lt;GFP-psy1 sid4-tdTomato::hphMX6 ura4-D18<br/>leu1-32 cyh<sup>R</sup> pmp3::kanMX4</i>         | [49]       |
| <i>SPBPB2B2.07cΔ</i> | <i>h<sup>90</sup> his5::URA3::his5 leu1&lt;&lt;GFP-psy1 sid4-tdTomato::hphMX6 ura4-D18<br/>leu1-32 cyh<sup>R</sup> SPBPB2B2.07c::kanMX4</i> | [49]       |
| <i>agn2Δ</i>         | <i>h<sup>90</sup> his5::URA3::his5 leu1&lt;&lt;GFP-psy1 sid4-tdTomato::hphMX6 ura4-D18<br/>leu1-32 cyh<sup>R</sup> agn2::kanMX4</i>         | [49]       |
| <i>ctl1Δ</i>         | <i>h<sup>90</sup> his5::URA3::his5 leu1&lt;&lt;GFP-psy1 sid4-tdTomato::hphMX6 ura4-D18<br/>leu1-32 cyh<sup>R</sup> ctl1::kanMX4</i>         | [49]       |
| <i>pmc1Δ</i>         | <i>h<sup>90</sup> his5::URA3::his5 leu1&lt;&lt;GFP-psy1 sid4-tdTomato::hphMX6 ura4-D18<br/>leu1-32 cyh<sup>R</sup> pmc1::kanMX4</i>         | [49]       |
| <i>fzr2Δ</i>         | <i>h<sup>90</sup> his5::URA3::his5 leu1&lt;&lt;GFP-psy1 sid4-tdTomato::hphMX6 ura4-D18<br/>leu1-32 cyh<sup>R</sup> fzr2::kanMX4</i>         | [49]       |
| <i>ubp4Δ</i>         | <i>h<sup>90</sup> his5::URA3::his5 leu1&lt;&lt;GFP-psy1 sid4-tdTomato::hphMX6 ura4-D18<br/>leu1-32 cyh<sup>R</sup> ubp4::kanMX4</i>         | [49]       |
| <i>fis1Δ</i>         | <i>h<sup>90</sup> his5::URA3::his5 leu1&lt;&lt;GFP-psy1 sid4-tdTomato::hphMX6 ura4-D18<br/>leu1-32 cyh<sup>R</sup> fis1::kanMX4</i>         | [49]       |

|                      |                                                                                                                                   |      |
|----------------------|-----------------------------------------------------------------------------------------------------------------------------------|------|
| <i>dsk1Δ</i>         | $h^{90}$ <i>his5::URA3::his5 leu1&lt;&lt;GFP-psyl sid4-tdTomato::hphMX6 ura4-D18 leu1-32 cyh<sup>R</sup> dsk1::kanMX4</i>         | [49] |
| <i>SPAC750.06cΔ</i>  | $h^{90}$ <i>his5::URA3::his5 leu1&lt;&lt;GFP-psyl sid4-tdTomato::hphMX6 ura4-D18 leu1-32 cyh<sup>R</sup> SPAC750.06c::kanMX4</i>  | [49] |
| <i>pcy1Δ</i>         | $h^{90}$ <i>his5::URA3::his5 leu1&lt;&lt;GFP-psyl sid4-tdTomato::hphMX6 ura4-D18 leu1-32 cyh<sup>R</sup> pcy1::kanMX4</i>         | [49] |
| <i>meu6Δ</i>         | $h^{90}$ <i>his5::URA3::his5 leu1&lt;&lt;GFP-psyl sid4-tdTomato::hphMX6 ura4-D18 leu1-32 cyh<sup>R</sup> meu6::kanMX4</i>         | [49] |
| <i>omh4Δ</i>         | $h^{90}$ <i>his5::URA3::his5 leu1&lt;&lt;GFP-psyl sid4-tdTomato::hphMX6 ura4-D18 leu1-32 cyh<sup>R</sup> omh4::kanMX4</i>         | [49] |
| <i>gsk31Δ</i>        | $h^{90}$ <i>his5::URA3::his5 leu1&lt;&lt;GFP-psyl sid4-tdTomato::hphMX6 ura4-D18 leu1-32 cyh<sup>R</sup> gsk31::kanMX4</i>        | [49] |
| <i>gor1Δ</i>         | $h^{90}$ <i>his5::URA3::his5 leu1&lt;&lt;GFP-psyl sid4-tdTomato::hphMX6 ura4-D18 leu1-32 cyh<sup>R</sup> gor1::kanMX4</i>         | [49] |
| <i>SPBC1348.01Δ</i>  | $h^{90}$ <i>his5::URA3::his5 leu1&lt;&lt;GFP-psyl sid4-tdTomato::hphMX6 ura4-D18 leu1-32 cyh<sup>R</sup> SPBC1348.01::kanMX4</i>  | [49] |
| <i>psk1Δ</i>         | $h^{90}$ <i>his5::URA3::his5 leu1&lt;&lt;GFP-psyl sid4-tdTomato::hphMX6 ura4-D18 leu1-32 cyh<sup>R</sup> psk1::kanMX4</i>         | [49] |
| <i>elo1Δ</i>         | $h^{90}$ <i>his5::URA3::his5 leu1&lt;&lt;GFP-psyl sid4-tdTomato::hphMX6 ura4-D18 leu1-32 cyh<sup>R</sup> elo1::kanMX4</i>         | [49] |
| <i>idn1Δ</i>         | $h^{90}$ <i>his5::URA3::his5 leu1&lt;&lt;GFP-psyl sid4-tdTomato::hphMX6 ura4-D18 leu1-32 cyh<sup>R</sup> idn1::kanMX4</i>         | [49] |
| <i>ryh1Δ</i>         | $h^{90}$ <i>his5::URA3::his5 leu1&lt;&lt;GFP-psyl sid4-tdTomato::hphMX6 ura4-D18 leu1-32 cyh<sup>R</sup> ryh1::kanMX4</i>         | [49] |
| <i>gma12Δ</i>        | $h^{90}$ <i>his5::URA3::his5 leu1&lt;&lt;GFP-psyl sid4-tdTomato::hphMX6 ura4-D18 leu1-32 cyh<sup>R</sup> gma12::kanMX4</i>        | [49] |
| <i>git5Δ</i>         | $h^{90}$ <i>his5::URA3::his5 leu1&lt;&lt;GFP-psyl sid4-tdTomato::hphMX6 ura4-D18 leu1-32 cyh<sup>R</sup> git5::kanMX4</i>         | [49] |
| <i>SPAC212.04cΔ</i>  | $h^{90}$ <i>his5::URA3::his5 leu1&lt;&lt;GFP-psyl sid4-tdTomato::hphMX6 ura4-D18 leu1-32 cyh<sup>R</sup> SPAC212.04c::kanMX4</i>  | [49] |
| <i>SPAC212.01cΔ</i>  | $h^{90}$ <i>his5::URA3::his5 leu1&lt;&lt;GFP-psyl sid4-tdTomato::hphMX6 ura4-D18 leu1-32 cyh<sup>R</sup> SPAC212.01c::kanMX4</i>  | [49] |
| <i>meu31Δ</i>        | $h^{90}$ <i>his5::URA3::his5 leu1&lt;&lt;GFP-psyl sid4-tdTomato::hphMX6 ura4-D18 leu1-32 cyh<sup>R</sup> meu31::kanMX4</i>        | [49] |
| <i>pet2Δ</i>         | $h^{90}$ <i>his5::URA3::his5 leu1&lt;&lt;GFP-psyl sid4-tdTomato::hphMX6 ura4-D18 leu1-32 cyh<sup>R</sup> pet2::kanMX4</i>         | [49] |
| <i>fbp1Δ</i>         | $h^{90}$ <i>his5::URA3::his5 leu1&lt;&lt;GFP-psyl sid4-tdTomato::hphMX6 ura4-D18 leu1-32 cyh<sup>R</sup> fbp1::kanMX4</i>         | [49] |
| <i>SPAC4F10.16cΔ</i> | $h^{90}$ <i>his5::URA3::his5 leu1&lt;&lt;GFP-psyl sid4-tdTomato::hphMX6 ura4-D18 leu1-32 cyh<sup>R</sup> SPAC4F10.16c::kanMX4</i> | [49] |
| <i>rit1Δ</i>         | $h^{90}$ <i>his5::URA3::his5 leu1&lt;&lt;GFP-psyl sid4-tdTomato::hphMX6 ura4-D18 leu1-32 cyh<sup>R</sup> rit1::kanMX4</i>         | [49] |
| <i>gld1Δ</i>         | $h^{90}$ <i>his5::URA3::his5 leu1&lt;&lt;GFP-psyl sid4-tdTomato::hphMX6 ura4-D18 leu1-32 cyh<sup>R</sup> gld1::kanMX4</i>         | [49] |
| <i>SPCC1739.08cΔ</i> | $h^{90}$ <i>his5::URA3::his5 leu1&lt;&lt;GFP-psyl sid4-tdTomato::hphMX6 ura4-D18 leu1-32 cyh<sup>R</sup> SPCC1739.08c::kanMX4</i> | [49] |
| <i>pdh1Δ</i>         | $h^{90}$ <i>his5::URA3::his5 leu1&lt;&lt;GFP-psyl sid4-tdTomato::hphMX6 ura4-D18 leu1-32 cyh<sup>R</sup> pdh1::kanMX4</i>         | [49] |
| <i>eng2Δ</i>         | $h^{90}$ <i>his5::URA3::his5 leu1&lt;&lt;GFP-psyl sid4-tdTomato::hphMX6 ura4-D18 leu1-32 cyh<sup>R</sup> eng2::kanMX4</i>         | [49] |
| <i>mok14Δ</i>        | $h^{90}$ <i>his5::URA3::his5 leu1&lt;&lt;GFP-psyl sid4-tdTomato::hphMX6 ura4-D18 leu1-32 cyh<sup>R</sup> mok14::kanMX4</i>        | [49] |
| <i>ndk1Δ</i>         | $h^{90}$ <i>his5::URA3::his5 leu1&lt;&lt;GFP-psyl sid4-tdTomato::hphMX6 ura4-D18 leu1-32 cyh<sup>R</sup> ndk1::kanMX4</i>         | [49] |

---

KI36, KI173 and YN68 strains were provided by the National Bio-Resource Project (NBRP), Japan. The *S. pombe* strains constructed in this study have been deposited with the NBRP under the NBRP IDs shown here. Related strains are also deposited.
