# Supplementary material for: The Fission Yeast RNA-Binding Protein Meu5 Is Involved in Outer Forespore Membrane Breakdown during Spore Formation
Source: MDPI journal article supplement (doi:10.3390/jof6040284), 2020-11-13
Supplement: s1 [file s1]

**Table S2.** DNA Primers

| Name     | Sequence                              |
|----------|---------------------------------------|
| itr1f    | 5'-CTCTCTGTCCCCGGACAGTATGAAGATGAA-3'  |
| itr1r    | 5'-GCTTTCAGCATTAACGAATTTGACGAACCC-3'  |
| itr2f    | 5'-GGGTTCGTCAAATTCGTTAATGCTGAAAGC-3'  |
| itr2r    | 5'-TCTGAGACTGTTTGAGTCCTGGCTTAACG-3'   |
| meu5pc.1 | 5'-CACACGAGCTCCAGTGACAAAATCCGAGG-3'   |
| meu5pc.2 | 5'-CACACGGGCCCCGCAATAGCATGTGAGGCGG-3' |
